# Supplementary material for: A Circadian Clock-Regulated Toggle Switch Explains AtGRP7 and AtGRP8 Oscillations in Arabidopsis thaliana
Source: PLOS journal article supplement (doi:10.1371/journal.pcbi.1002986), 2013-03-28
Supplement: S11 (10.1371/journal.pcbi.1002986.s011) [file journal.pcbi.1002986.s011]

301 Moved Permanently

# Moved Permanently

The document has moved here.

---

Apache Server at www.ploscompbiol.org Port 80
